# Supplementary material for: Impact of growth media and pressure on the diversity and antimicrobial activity of isolates from two species of hexactinellid sponge
Source: PubMed Central journal article supplement (PMC8744994; doi:10.1099/mic.0.001123), 2021-12-13
Supplement: mic-167-1123-s001.pdf [file mic-167-1123-s001.pdf]

## Supplementary Data S1

**Table 1** – Media used for the culture of bacterial strains I this study

| Media/Component                         | Code      | Composition                                                                                                                                                                                                                                                                                                                                                                                                             | Reference                                       |
|-----------------------------------------|-----------|-------------------------------------------------------------------------------------------------------------------------------------------------------------------------------------------------------------------------------------------------------------------------------------------------------------------------------------------------------------------------------------------------------------------------|-------------------------------------------------|
| <b>ABC (Agar)</b>                       | ABC       | 25g/L MgSO <sub>4</sub> ·7H <sub>2</sub> O, 22.5g/L (NH <sub>4</sub> ) <sub>2</sub> SO <sub>4</sub> , 7.5g/L Na <sub>2</sub> SO <sub>4</sub> ·10H <sub>2</sub> O, 2.5g/L KH <sub>2</sub> PO <sub>4</sub> , 2.5g/L KCl, 0.7g/L Ca(NO <sub>3</sub> ) <sub>2</sub> ·4H <sub>2</sub> O, phosphate buffer (20mM final), 0.1g/L peptone, 0.1g/L yeast extract, 0.1 g/L glucose, ddH <sub>2</sub> O, 1.5% agar (Sigma-Aldrich) | Kato et al., 2018                               |
| <b>LB, Miller</b>                       | LB/L      | 1.5% agar (Sigma-Aldrich), ddH <sub>2</sub> O                                                                                                                                                                                                                                                                                                                                                                           | -                                               |
| <b>LB, Miller + Carnitine</b>           | LC        | 1.5% agar (Sigma-Aldrich), ddH <sub>2</sub> O, 0.2g/L Carnitine Hydrochloride                                                                                                                                                                                                                                                                                                                                           | -                                               |
| <b>Low nutrient heterotrophic media</b> | LNHM      | 1.0 μM NH <sub>4</sub> Cl, 0.1 μM KH <sub>2</sub> PO <sub>4</sub> , and vitamin mix <sup>(a)</sup> at a 10 <sup>-4</sup> dilution of stock<br>1.5% agar (Sigma-Aldrich), ddH <sub>2</sub> O                                                                                                                                                                                                                             | Cho and Giovannoni, 2004                        |
| <b>Marine Agar</b>                      | MA/M      | 37.4 g/L Marine Broth 2216 (BD Difco), 1.5% agar (Sigma-Aldrich), ddH <sub>2</sub> O                                                                                                                                                                                                                                                                                                                                    | -                                               |
| <b>Marine Agar + Carnitine</b>          | MC        | 37.4 g/L Marine Broth 2216 (BD Difco), 1.5% agar (Sigma-Aldrich), ddH <sub>2</sub> O, 0.2g/L Carnitine Hydrochloride                                                                                                                                                                                                                                                                                                    | -                                               |
| <b>Marine Broth</b>                     | MB        | 37.4 g/L Marine Broth 2216 (BD Difco), ddH <sub>2</sub> O                                                                                                                                                                                                                                                                                                                                                               | -                                               |
| <b>Oatmeal Agar</b>                     | OM        | 72.5 g/L Oatmeal agar (Sigma), 33.3 g/L Instant Ocean™, ddH <sub>2</sub> O                                                                                                                                                                                                                                                                                                                                              | -                                               |
| <b>ABC, Broth</b>                       | ABC       | Basal salts, 1.5% agar (Sigma-Aldrich), phosphate buffer (20mM final), 0.1g/L peptone, 0.1g/L yeast extract , 0.1g/L glucose                                                                                                                                                                                                                                                                                            | Kato et al., 2018                               |
| <b>R2a + Carnitine</b>                  | RC        | 18.1 g/L R2a, 1.5% agar (Sigma-Aldrich), ddH <sub>2</sub> O, 0.2g/L Carnitine Hydrochloride                                                                                                                                                                                                                                                                                                                             | -                                               |
| <b>R2a + Filter Sterilised Seawater</b> | FSSW      | 9.05 g/L R2a, 0.22-μm filter sterilised seawater                                                                                                                                                                                                                                                                                                                                                                        |                                                 |
| <b>R2a + Sponge spicule extract</b>     | R2a + SSE | 9.05 g/L R2a, 40 ml/L sponge spicule extract <sup>(b)</sup> , 1.5% agar, 33.3 g/L Instant Ocean™, ddH <sub>2</sub> O                                                                                                                                                                                                                                                                                                    | Sipkema et al, 2011; Keren, Lavy and Ilan 2016; |
| <b>Reasoner's 2A agar</b>               | R2a/R     | 18.1 g/L Reasoner's 2 agar (Oxoid), 33.3 g/L Instant Ocean™, ddH <sub>2</sub> O                                                                                                                                                                                                                                                                                                                                         | -                                               |

| Media/Component                      | Code                     | Composition                                                                                                                                                                | Reference                            |
|--------------------------------------|--------------------------|----------------------------------------------------------------------------------------------------------------------------------------------------------------------------|--------------------------------------|
| <b>R2a + 24 h LNHM Enrichment</b>    | R2a +<br>24 h<br>Enrich. | 10 g sponge homogenate was centrifuge (4696 x g, 20 min) and pellet re-suspended in 10 ml LNHM and incubated at 4°C for 24 h. Enriched inoculated was inoculated on ½ R2a. | Bowman 2001; Cho and Giovannoni 2004 |
| <b>Starch-Yeast-Peptone-Seawater</b> | SYP-SW                   | 10g/L Starch, 4g/L Yeast Extract, 2g/L Peptone, Autoclaved Seawater                                                                                                        | Margassery et al., 2012              |
| <b>Tryptic Soy Agar</b>              | TSA                      | 1.5% agar (Sigma-Aldrich), ddH <sub>2</sub> O                                                                                                                              |                                      |

<sup>(a)</sup> Thiamine HCl 0.2 mg/L, biotin 1 µg/L, vitamin B<sub>12</sub> 1 µg/L, Folic acid 2 µg/L, Pabs 10 µg/L, Nicotinic acid 0.1 mg/L, Inisitol 1.0 mg/L, Calcium panthothenate 0.2 mg/L, Pyradoxine HCl 0.1 mg/L

<sup>(b)</sup> 10 g sponge host tissue were homogenised with sterilised mortar and pestle. Homogenate was extracted overnight in 50 ml ddH<sub>2</sub>O and filtered sterilised using a 0.22-µm filter. Cake remaining on filter was suspended in 50 ml ddH<sub>2</sub>O, centrifuged at 138 x g for 10 min and pellet re-suspended in 20 ml ddH<sub>2</sub>O to make SSE (Sipkema *et al.* 2011).

24 h enrichment

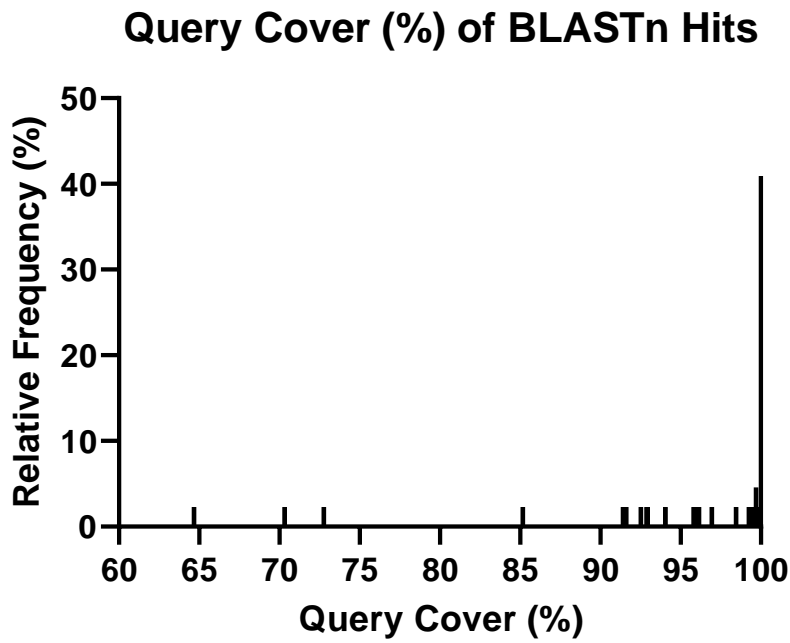

**Figure S1** – Query Cover (%) matches for 16S rDNA sequences submitted to BLASTn

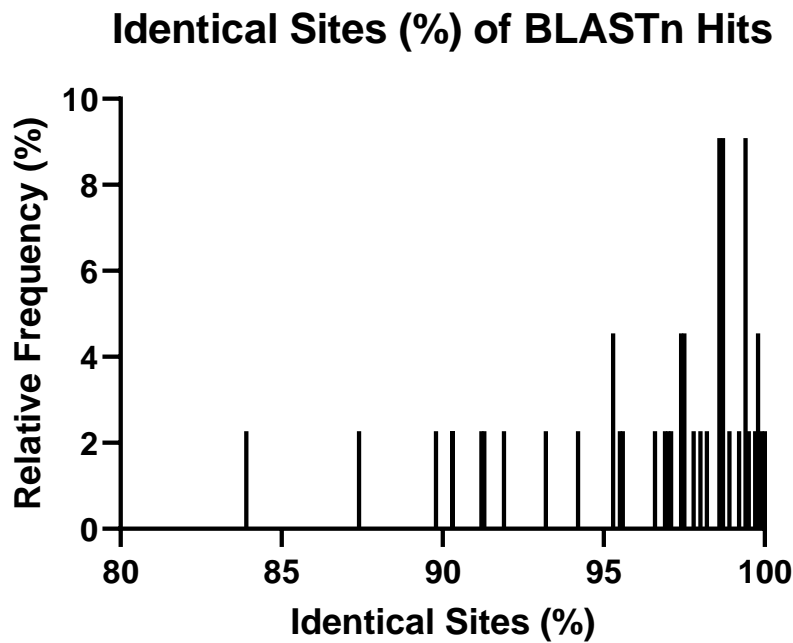

**Figure S2** – Identical site (%) matches for 16S rDNA sequences submitted to BLASTn

### Sequence Length (bp) of BLASTN Queries (n=44)

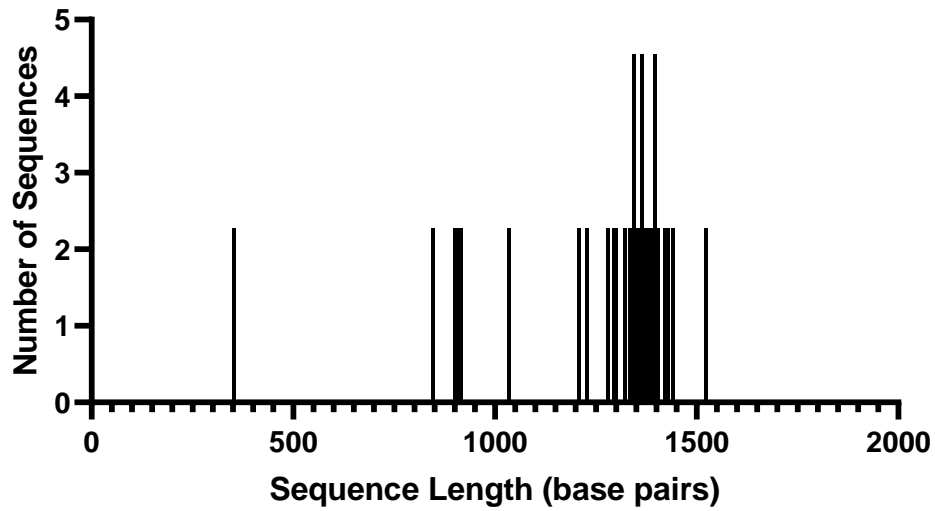

**Figure S3** – Sequence length (base pairs) of 16S sequences submitted to BLASTn

**Table 2** – Community richness and diversity estimates for isolates cultured under different atmospheric conditions

|                               | Chao1 Richness | Shannon Diversity | Simpson Diversity | Pielou Evenness |
|-------------------------------|----------------|-------------------|-------------------|-----------------|
| 21% O <sub>2</sub> / 1.01 bar | 37             | 2.625048          | 0.919668          | 0.96935         |
| 21% O <sub>2</sub> /5 bar     | 22             | 1.666333          | 0.743802          | 0.856326        |
| 4% O <sub>2</sub> /5 bar      | 16.5           | 2.069202          | 0.857143          | 0.941734        |

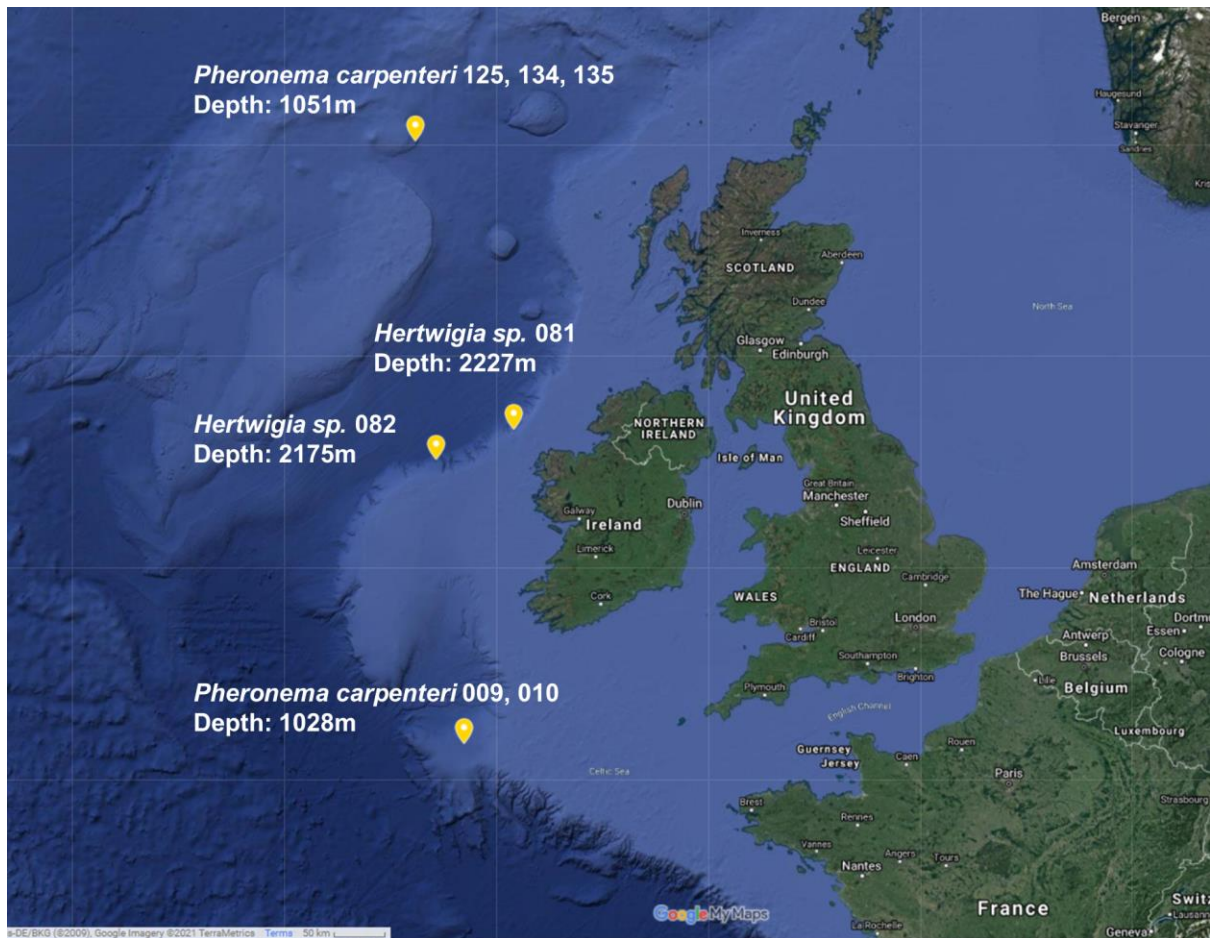

**Figure S4** – GPS co-ordinates of collection sites for sponges used in this study.

Picture obtained by inserting sample co-ordinates into Google Maps.

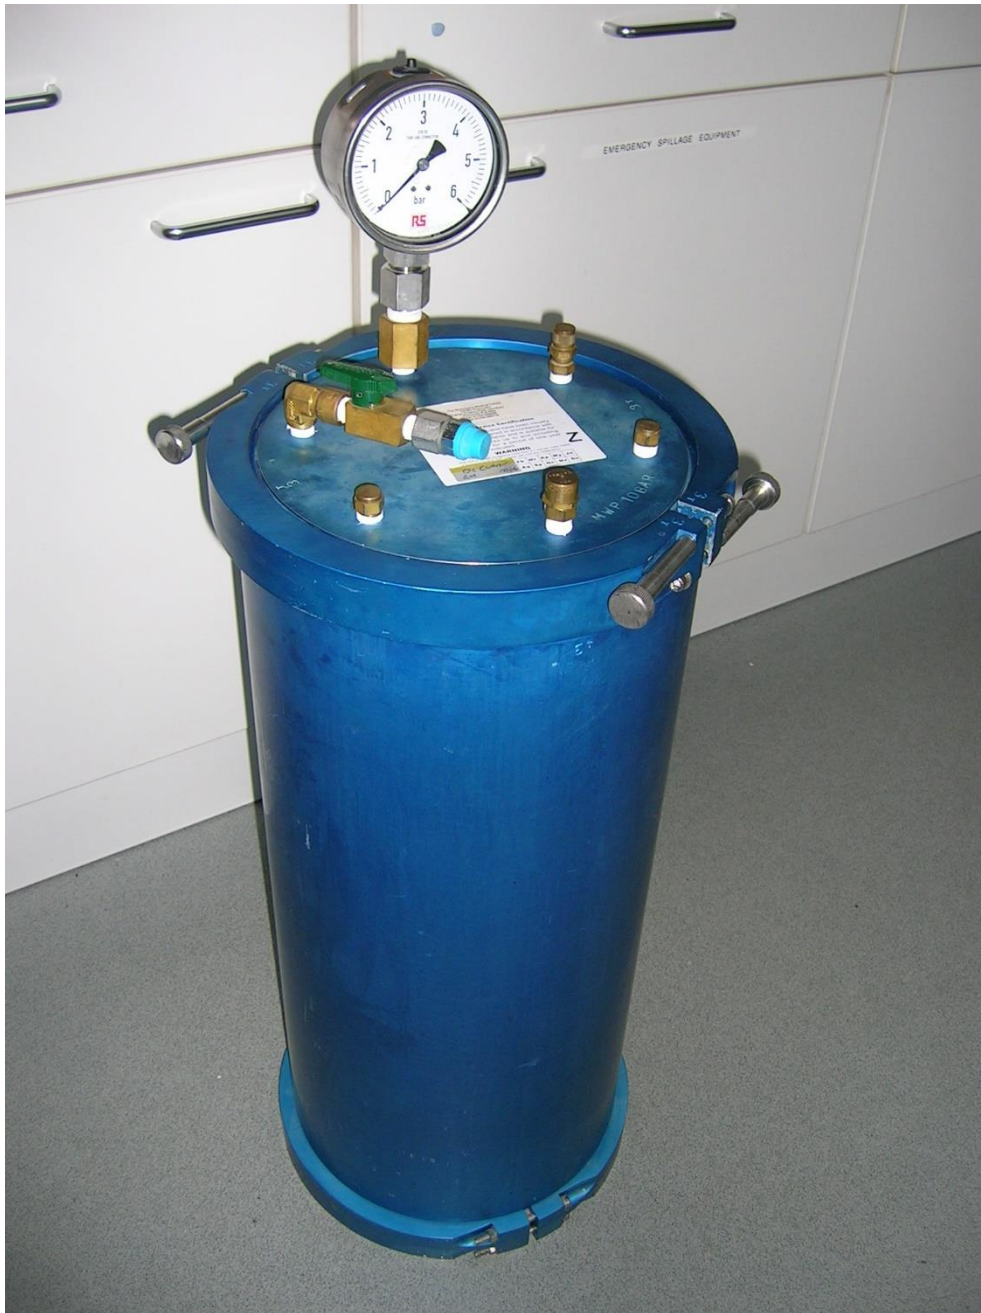

**Figure S5** – Chamber used to culture bacteria under increased atmospheric pressure

**Table 3 – Samples collection metadata for sponges used in this study**

| <b>Cruise</b> | <b>ROV</b> | <b>ROV Dive</b> | <b>Sample ID</b> | <b>Date</b> | <b>Latitude</b> | <b>Longitude</b> | <b>Depth (m)</b> | <b>Pressure (bar)</b> | <b>Temp°C</b> |
|---------------|------------|-----------------|------------------|-------------|-----------------|------------------|------------------|-----------------------|---------------|
| JC136         | Isis       | 295             | JC136_135        | 6/16/2016   | 58.8546378      | -13.3993737      | 1051             | 107                   | 6.39          |
| JC136         | Isis       | 295             | JC136_134        | 6/16/2016   | 58.8546885      | -13.3994155      | 1051             | 107                   | 6.39          |
| JC136         | Isis       | 295             | JC136_125        | 6/16/2016   | 58.8547103      | -13.3994087      | 1051             | 107                   | 6.39          |
| GRNL2017      | Holland I  | 495             | GRNL_081         | 7/20/2017   | 54.1867235      | -12.8472535      | 2228             | 225                   | 3.49          |
| GRNL2017      | Holland I  | 495             | GRNL_082         | 7/20/2017   | 54.18651317     | -12.847798       | 2175             | 220                   | 3.5           |
| CE19015       | Holland I  | 683             | Sponge_009       | 8/13/2019   | 49.534534       | -12.10624333     | 1208             | 122                   | 6             |
| CE19015       | Holland I  | 683             | Sponge_010       | 8/13/2019   | 49.53452567     | -12.10614217     | 1208             | 122                   | 6             |

**Table 4** – Genbank accession numbers for strains reported in this study

| #Accession | Sequence ID                                     | Release Date   |
|------------|-------------------------------------------------|----------------|
| MZ723441   | Bacillus_pumilus_strain_EE112_P4                | "Aug 13, 2021" |
| MZ723442   | Methylobacterium_goelsingense_strain_PAMC_29342 | "Aug 13, 2021" |
| MZ723443   | Pseudomonas_sp_JHX-241_1                        | "Aug 13, 2021" |
| MZ723444   | Pseudomonas_sp_JHX-241_2                        | "Aug 13, 2021" |
| MZ723445   | Brevibacterium_frigoritolerans_strain_ER52      | "Aug 13, 2021" |
| MZ723446   | Psychrobacter_piscatorii_strain_EnD-2           | "Aug 13, 2021" |
| MZ723447   | Psychrobacter_sp_4-Z18                          | "Aug 13, 2021" |
| MZ723448   | Uncultured_bacterium_clone_7A_11-051            | "Aug 13, 2021" |
| MZ723449   | Rhodococcus_sp_SS51_7                           | "Aug 13, 2021" |
| MZ723450   | Psychrobacter_sp_JXH-75_1                       | "Aug 13, 2021" |
| MZ723451   | Rhodococcus_yunnanensis_strain_YIM_70056        | "Aug 13, 2021" |
| MZ723452   | Micromonospora_tulbaghiaie_strain_Pw20-195      | "Aug 13, 2021" |
| MZ723453   | Micrococcus_antarcticus_strain_XH180            | "Aug 13, 2021" |
| MZ723454   | Bacillus_algicola_strain_HMF_4132               | "Aug 13, 2021" |
| MZ723455   | Psychrobacter_sp_strain_AHE_PA_1                | "Aug 13, 2021" |
| MZ723456   | Psychrobacter_sp_JXH-75_2                       | "Aug 13, 2021" |
| MZ723457   | Pseudomonas_sp_JHX-241_3                        | "Aug 13, 2021" |
| MZ723458   | Psychrobacter_sp_strain_CJKOP-63_1              | "Aug 13, 2021" |
| MZ723459   | Kocuria_indica_strain_MS51                      | "Aug 13, 2021" |
| MZ723460   | Erythrobacter_sp_strain_LA324                   | "Aug 13, 2021" |
| MZ723461   | Psychrobacter_sp_strain_CJKOP-63_2              | "Aug 13, 2021" |
| MZ723462   | Dermacoccus_nishinomiyaensis_strain_BCX_20      | "Aug 13, 2021" |
| MZ723463   | Bacillus_sp_ITP29                               | "Aug 13, 2021" |
| MZ723464   | Psychrobacter_sp_strain_AHE_PA_2                | "Aug 13, 2021" |
| MZ723465   | Pseudomonas_sp_JHX-241_4                        | "Aug 13, 2021" |
| MZ723466   | Brevibacterium_frigoritolerans_strain_F124      | "Aug 13, 2021" |
| MZ723467   | Uncultured_bacterium_clone_Md-9                 | "Aug 13, 2021" |
| MZ723468   | Pseudomonas_sp_strain_IMBM09_1                  | "Aug 13, 2021" |
| MZ723469   | Erythrobacter_sp_strain_A6_0                    | "Aug 13, 2021" |
| MZ723470   | Dietzia_sp_strain_H0B                           | "Aug 13, 2021" |
| MZ723471   | Psychrobacter_sp_strain_CKJOP-63                | "Aug 13, 2021" |
| MZ723472   | Pseudomonas_stutzeri_strain_2Dphe2              | "Aug 13, 2021" |
| MZ723473   | Psychrobacter_sp_strain_AHE_PA_3                | "Aug 13, 2021" |



|          |                                          |                |
|----------|------------------------------------------|----------------|
| MZ723474 | Microbacterium_maritypicum_strain_P-BL63 | "Aug 13, 2021" |
| MZ723475 | Bacillus_sp_strain_MJS-AB-C4             | "Aug 13, 2021" |
| MZ723476 | Bacillus_toyonensis_strain_WS1-2         | "Aug 13, 2021" |
| MZ723477 | Dietzia_psychralcaliphila_strain_Y96     | "Aug 13, 2021" |
| MZ723478 | Rhodococcus_sp_HLSB305_2                 | "Aug 13, 2021" |
| MZ723479 | Pseudomonas_sp_strain_IMBM09_2           | "Aug 13, 2021" |

## References

Bowman, J. P. (2001) 'Methods for psychrophilic bacteria', *Methods in Microbiology*, pp. 591–614.

Cho, J. C. and Giovannoni, S. J. (2004) 'Cultivation and Growth Characteristics of a Diverse Group of Oligotrophic Marine Gammaproteobacteria', *Applied and Environmental Microbiology*, 70(1), pp. 432-440.2004.

Kato, S. *et al.* (2018) 'Isolation of previously uncultured slowgrowing bacteria by using a simple modification in the preparation of agar media', *Applied and Environmental Microbiology*, 84(19).

Keren, R., Lavy, A. and Ilan, M. (2016) 'Increasing the Richness of Culturable Arsenic-Tolerant Bacteria from *Theonella swinhoei* by Addition of Sponge Skeleton to the Growth Medium', *Microbial Ecology*, 71(4), pp. 873–886.

Margassery, L. M. *et al.* (2012) 'Diversity and antibacterial activity of bacteria isolated from the coastal marine sponges *Amphilectus fucorum* and *Eurypon major*', *Letters in Applied Microbiology*, 55(1), pp. 2–8.

Sipkema, D. *et al.* (2011) 'Multiple approaches to enhance the cultivability of bacteria associated with the marine sponge *Haliclona (gellius) sp*', *Applied and Environmental Microbiology*, 77(6), pp. 2130–2140.
